# Supplementary material
Source: PubMed Central journal article supplement (PMC4972678)
Supplement: NIHMS779526-supplement.pdf [file NIHMS779526-supplement.pdf]

## Engineered production of cancer targeting peptide (CTP)-containing C-1027 in *Streptomyces globisporus* and biological evaluation

Wenli Li<sup>a</sup>, Xiuling Li<sup>b</sup>, Tingting Huang<sup>c</sup>, Qihui Teng<sup>c</sup>, Ivana Crnovcic<sup>c</sup>, Christoph Rader<sup>b,d</sup> and Ben Shen<sup>\*a,c,d,e</sup>

<sup>a</sup>Division of Pharmaceutical Sciences, University of Wisconsin, Madison, WI 53705, USA, and <sup>b</sup>Department of Cancer Biology, <sup>c</sup>Department of Chemistry, <sup>d</sup>Department of Molecular Therapeutics, and <sup>e</sup>Natural Products Library Initiative at The Scripps Research Institute, The Scripps Research Institute, Jupiter, FL 33458, USA.

\*Correspondence to: E-mail: [shenb@scripps.edu](mailto:shenb@scripps.edu), Tel: (561) 228-2456, Fax: (561) 228-2472

### Supplementary Information

|                                                                                                                     |    |
|---------------------------------------------------------------------------------------------------------------------|----|
| <b>Table S1.</b> Bacterial plasmids and strains used in this study                                                  | S2 |
| <b>Figure S1.</b> C-1027 biosynthetic gene cluster and sequence alignment                                           | S3 |
| <b>Figure S2.</b> Electrospray mass spectra for native and NGR-containing CagAs                                     | S4 |
| <b>Figure S3.</b> Flow cytometric pattern of CD13 expression in selected cancer cell lines                          | S5 |
| <b>Figure S4.</b> Cytotoxicity of native and NGR-containing C-1027 chromoproteins toward selected cancer cell lines | S6 |
| <b>References</b>                                                                                                   | S7 |

**Table S1.** Bacterial strains and plasmids used in this study

| strains/ plasmids                       | genotype and description                                                                                                                                                                 | reference  |
|-----------------------------------------|------------------------------------------------------------------------------------------------------------------------------------------------------------------------------------------|------------|
| <i>E. coli</i> strains:                 |                                                                                                                                                                                          |            |
| DH5 $\alpha$                            | <i>E. coli</i> host for general subcloning                                                                                                                                               | 1          |
| ET12567/pUZ8002                         | Methylation-deficient <i>E. coli</i> host for intergeneric conjugation; contains pUZ8002, a non-transmissible <i>oriT</i> mobilizing plasmid.                                            | 2          |
| <i>Streptomyces globisporus</i> strains |                                                                                                                                                                                          |            |
| C-1027 (wild-type)                      | C-1027 wild type producer strain                                                                                                                                                         | 3          |
| SB1024                                  | <i>cagA</i> mutant resulted from integration of pBS1138 into <i>S. globisporus</i> wild-type, <i>ermE</i> inserted in the middle of <i>cagA</i> , Erm <sup>R</sup> , C-1027 nonproducing | This study |
| SB1025                                  | <i>cagA</i> mutant resulted from integration of pBS1139 into <i>S. globisporus</i> wild-type, <i>ermE</i> inserted downstream of <i>cagA</i> , Erm <sup>R</sup> , C-1027 nonproducing    | This study |
| SB1026                                  | recombinant strain resulted from integration of pBS1142 into <i>S. globisporus</i> SB1034, Apr <sup>S</sup> and Erm <sup>S</sup> , NGR-containing C-1027 producing                       | This study |
| <i>Micrococcus luteus</i> ATCC 9431     | Enediyne bioassay strain to measure the antibacterial activity                                                                                                                           | 4          |
| <b>Plasmids</b>                         |                                                                                                                                                                                          |            |
| pGEM-T Easy                             | Vector in <i>E. coli</i> for sub-cloning                                                                                                                                                 | Promega    |
| pUC18                                   | Vector in <i>E. coli</i> for sub-cloning                                                                                                                                                 | Stratagene |
| pIJ4026                                 | Vector containing the <i>ermE</i> cassette                                                                                                                                               | 5          |
| pKC1139                                 | <i>E. coli</i> - <i>Streptomyces</i> shuttle vector, temperature-sensitive replication origin, <i>aac(3)/IV</i> resistance                                                               | 6          |
| pBS1005                                 | pOJ446-derived <i>S. globisporus</i> genomic library cosmid                                                                                                                              | 7          |
| pBS1135                                 | pUC18 containing 4.3-kb <i>SacI</i> fragment from pBS1005                                                                                                                                | This study |
| pBS1136                                 | <i>ermE</i> from pIJ4026 ligated into <i>BstXI</i> site (downstream of <i>cagA</i> ) of pBS1135                                                                                          | This study |
| pBS1137                                 | <i>ermE</i> from pIJ4026 ligated into <i>XhoI</i> site (within the <i>cagA</i> ) of pBS1035                                                                                              | This study |
| pBS1138                                 | 5.76-kb <i>SacI</i> fragments from pBS1136 insert into <i>EcoRV</i> of pKC1139                                                                                                           | This study |
| pBS1139                                 | 5.76-kb <i>SacI</i> fragments from pBS1137 insert into <i>EcoRV</i> of pKC1139                                                                                                           | This study |
| pBS1140                                 | pGEM-T Easy containing PCR amplified <i>cagA</i> fragment encoding the NGR motif fused at its C-terminus                                                                                 | This study |
| pBS1141                                 | pBS1135 containing the <i>BclI/XhoI</i> fragment from pBS1140                                                                                                                            | This study |
| pBS1142                                 | 4.3-kb <i>EcoRI/HindIII</i> fragment from pBS1141 inserted into pKC1139                                                                                                                  | This study |

**Figure S1:** The C-1027 biosynthetic gene cluster from *S. globisporus* (accession no: AY048670) with the *cagA* gene highlighted with an arrow, and sequence alignment between CagA (accession no: BAA01609) and selected apo-proteins of enediyne chromoproteins NcsA for neocarzinostatin (accession no: BAA01764), KedA for kedarcidin (accession no: ADG01894), AxnA for actinoxanthin (accession no: BAA02014) and McmA for macromomycin (accession no: P01549). The leader peptides, which are cleaved after the transport of the chromoproteins outside of the cell, are indicated with a red box.

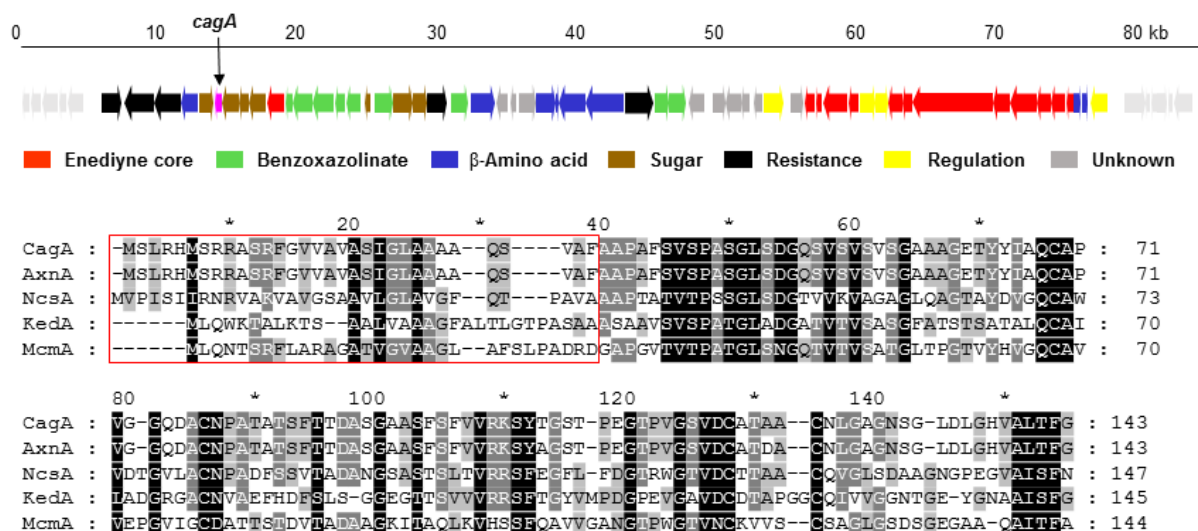

**Figure S2.** Electrospray mass spectra for native and NGR-containing CagAs. The predicted molecular weights of native and NGR-containing CagAs are 10,501.5 and 11,149.2 Da, respectively.

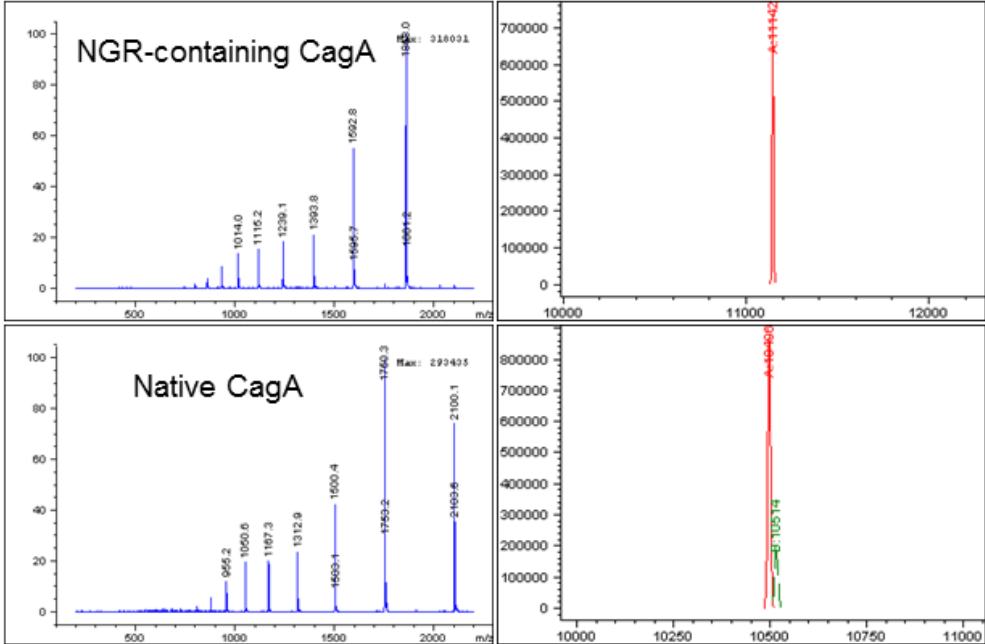

**Figure S3.** Flow cytometric pattern of CD13 expression in selected breast cancer cell lines. The expression levels of CD13 in breast cancer cell lines were analyzed by flow cytometry. Cells were stained with PE-conjugated anti-CD13 antibody.

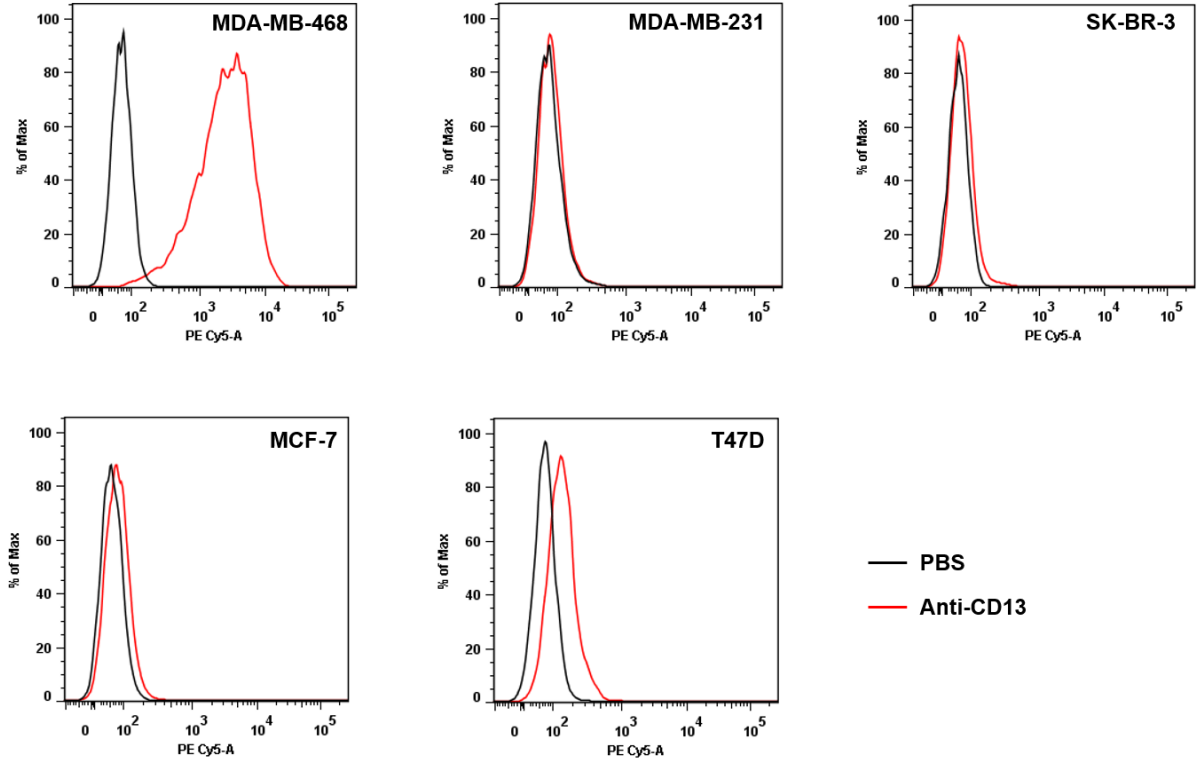

**Figure S4.** Cytotoxicity of native and NGR-containing C-1027 (NGR-C-1027) chromoproteins toward MDA-MB-468 (CD13-positive), MDA-MB-231 (CD13-negative), and SK-BR-3 (CD13-negative) cell lines. (A) Cells were incubated with the indicated concentration of C-1027 chromoproteins for 24 h before the MTS assay was developed. (B) Cells were incubated with indicated concentration of drugs for 15 min before being washed with PBS. Cells were further incubated with drug-free complete medium for 72 h before the MTS assay was developed. Cell viability was calculated as percentage of untreated control. Each point represents the mean  $\pm$  SD of 3 replicates, and the IC<sub>50</sub>s were determined by a computerized curve fitting using GraphPad Prism as summarized in Table 1.

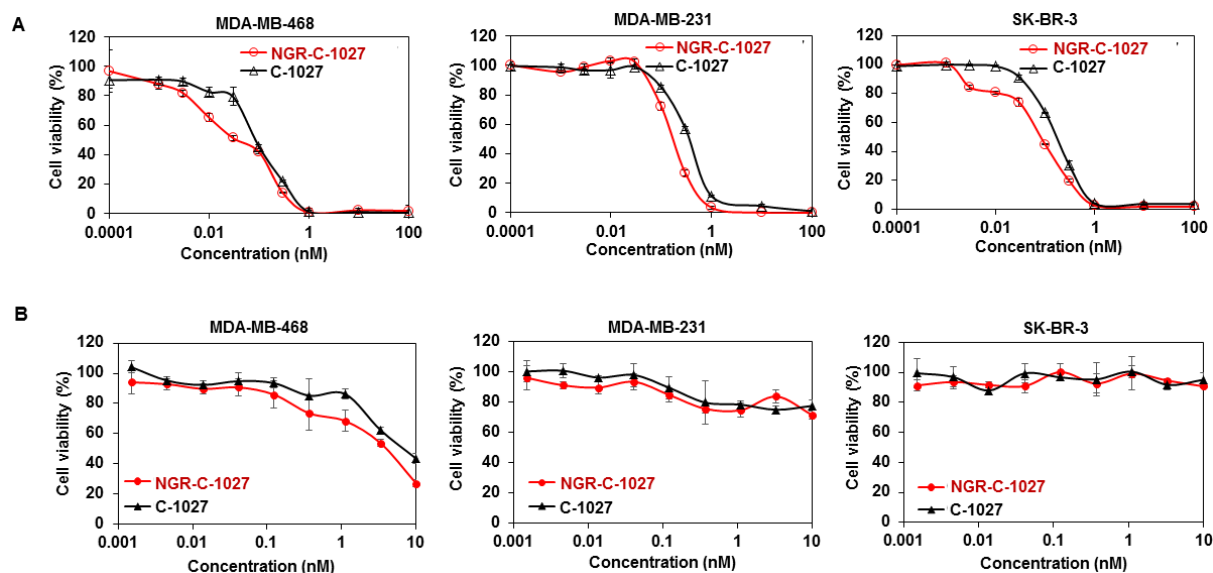

## References

1. Sambrook, J.; Fritsch, E. F.; Maniatis, T. *Molecular Cloning: A Laboratory Manual*, Second Edition. Cold Spring Harbor, NY: Cold Spring Harbor Laboratory Press; **1989**.
2. Kieser, T., Bibb, M. J.; Chater, K. F.; Buttner, M. J.; Hopwood, D. *Practical Streptomyces genetics: a laboratory manual*. Norwich: John Innes Foundation, Norwich, UK; **2000**.
3. Liu, W.; Christenson, S. D.; Standage, S.; Shen, B. Biosynthesis of the enediyne antitumor antibiotic C-1027. *Science*. **2002**, *297*, 1170-1173.
4. Hu, J. L. Xue, Y. C. Xie, M. Y. Zhang, R. Otani, T. Minami, Y. Yamada, Y. Marunaka, T. A new macromolecular antitumor antibiotic, C-1027. I. Discovery, taxonomy of producing organism, fermentation and biological activity. *J Antibiot*. **1988**, *41*, 1575-1579.
5. Bibb, M. J.; Janssen, G. R.; Ward, J. M. Cloning and analysis of the promoter region of the erythromycin resistance gene (*ermE*) of *Streptomyces erythraeus*. *Gene*, **1985**, *38*, 215–226.
6. Bierman, M.; Logan, R.; O'Brien, K.; Seno, E. T.; Rao, R. N.; Schonert, B. E. Plasmid cloning vectors for the conjugal transfer of DNA from *Escherichia coli* to *Streptomyces* spp. *Gene*. **1992**, *116*, 43-69.
7. Liu, W.; Shen, B. Genes for production of the enediyne antitumor antibiotic C-1027 in *Streptomyces globisporus* are clustered with the *cagA* gene that encodes the C-1027 apoprotein. *Antimicrob Agents Chemother*. **2000**, *44*, 382-392.
8. Sievers, F.; Wilm, A.; Dineen, D.; Gibson, T. J.; Karplus, K.; Li, W.; Lopez, R.; McWilliam, H.; Remmert, M.; Söding, J.; Thompson, J. D.; Higgins, D. G. Fast, scalable generation of high-quality protein multiple sequence alignments using Clustal Omega. *Mol Syst Biol*. **2011**, *7*, 539.
9. Nicholas, K. B., Nicholas, H.B. Jr., Deerfield, D.W. II. GeneDoc: Analysis and Visualization of Genetic Variation, EMBNEW.NEWS. **1997**, *4*, 14.
